# Supplementary material
Source: PubMed Central journal article supplement (PMC3387318)
Supplement: NIHMS368569-supplement-01.pdf [file NIHMS368569-supplement-01.pdf]

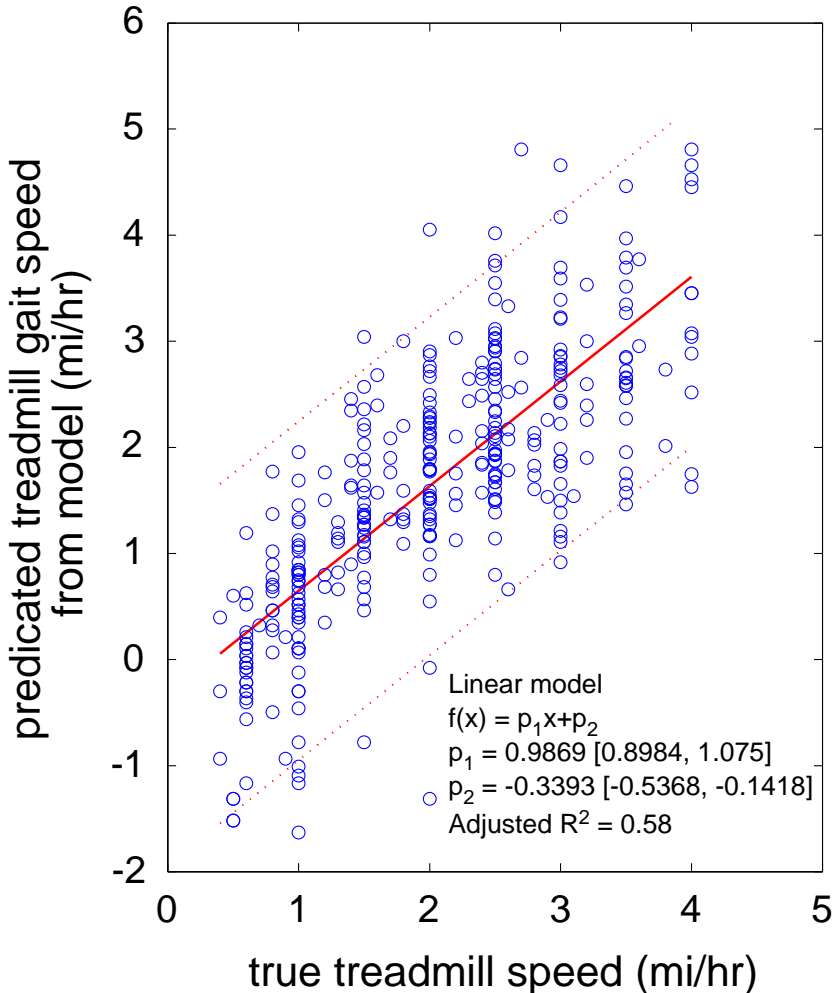

**Supplemental Figure 1.** Predictive model sensitive to changes in observed treadmill gait speed. Representative analysis from an 80% downsampled jackknife data set. Regression analysis and confidence intervals calculated to observed values. Note that slope of regression line is approximately 1, suggesting that model has similar sensitivity to changes in treadmill gait speed compared to 'gold standard' changes evoked by the investigator during testing.
